# Supplementary material
Source: PubMed Central journal article supplement (PMC3170155)

# SUPPLEMENTARY DATA

FIG. S1. Most-inclusive models for GBT 2005, GBT 2006, and WAK 2005.

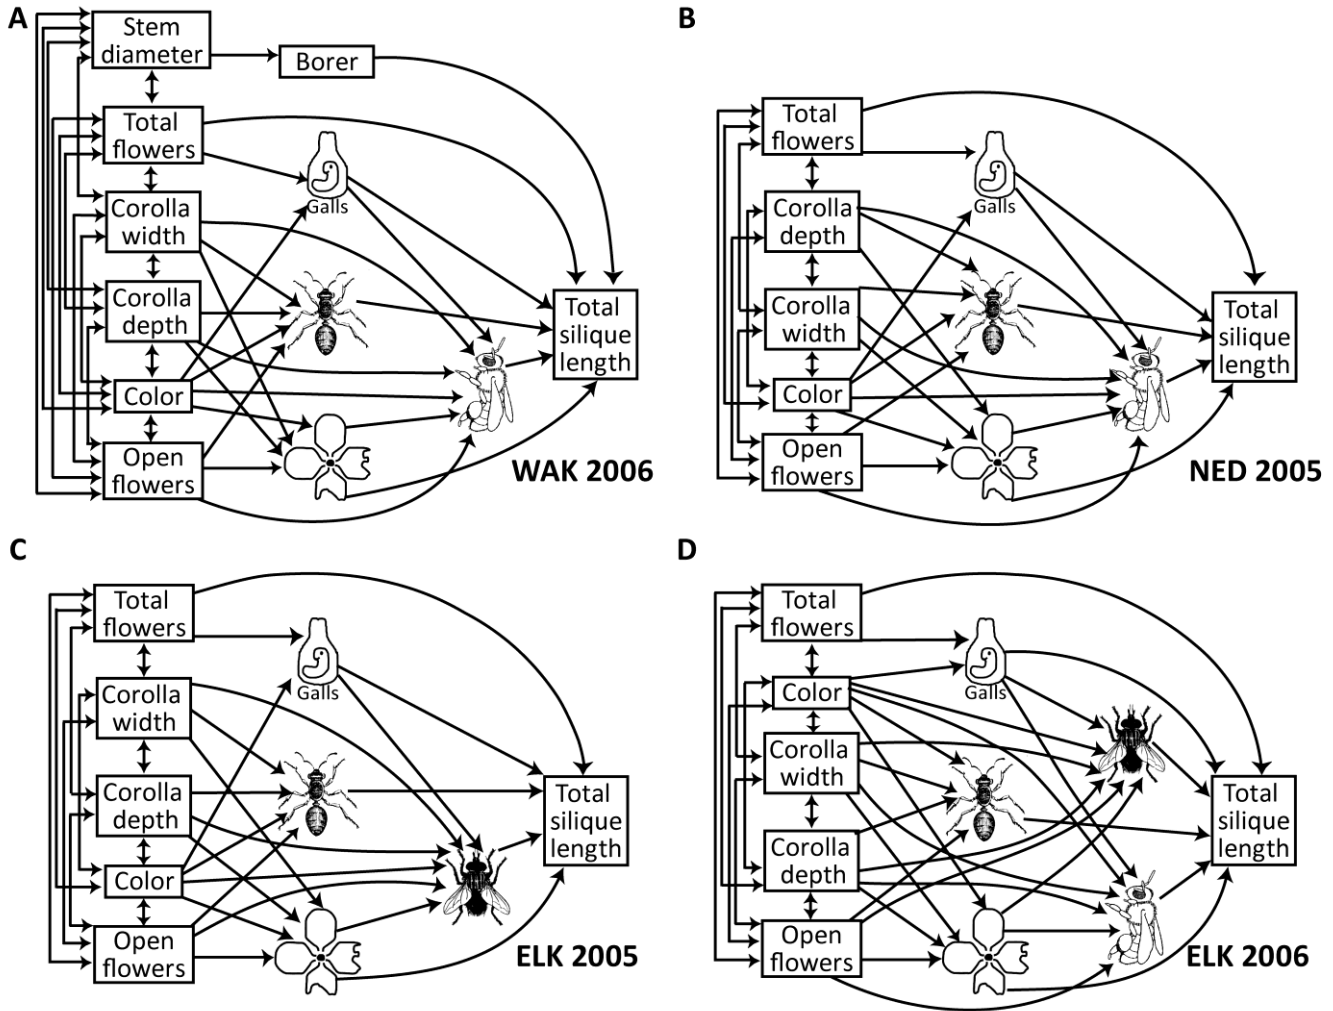

FIG. S2. Most-inclusive models for WAK 2006, NED 2005, ELK 2005, and ELK 2006.

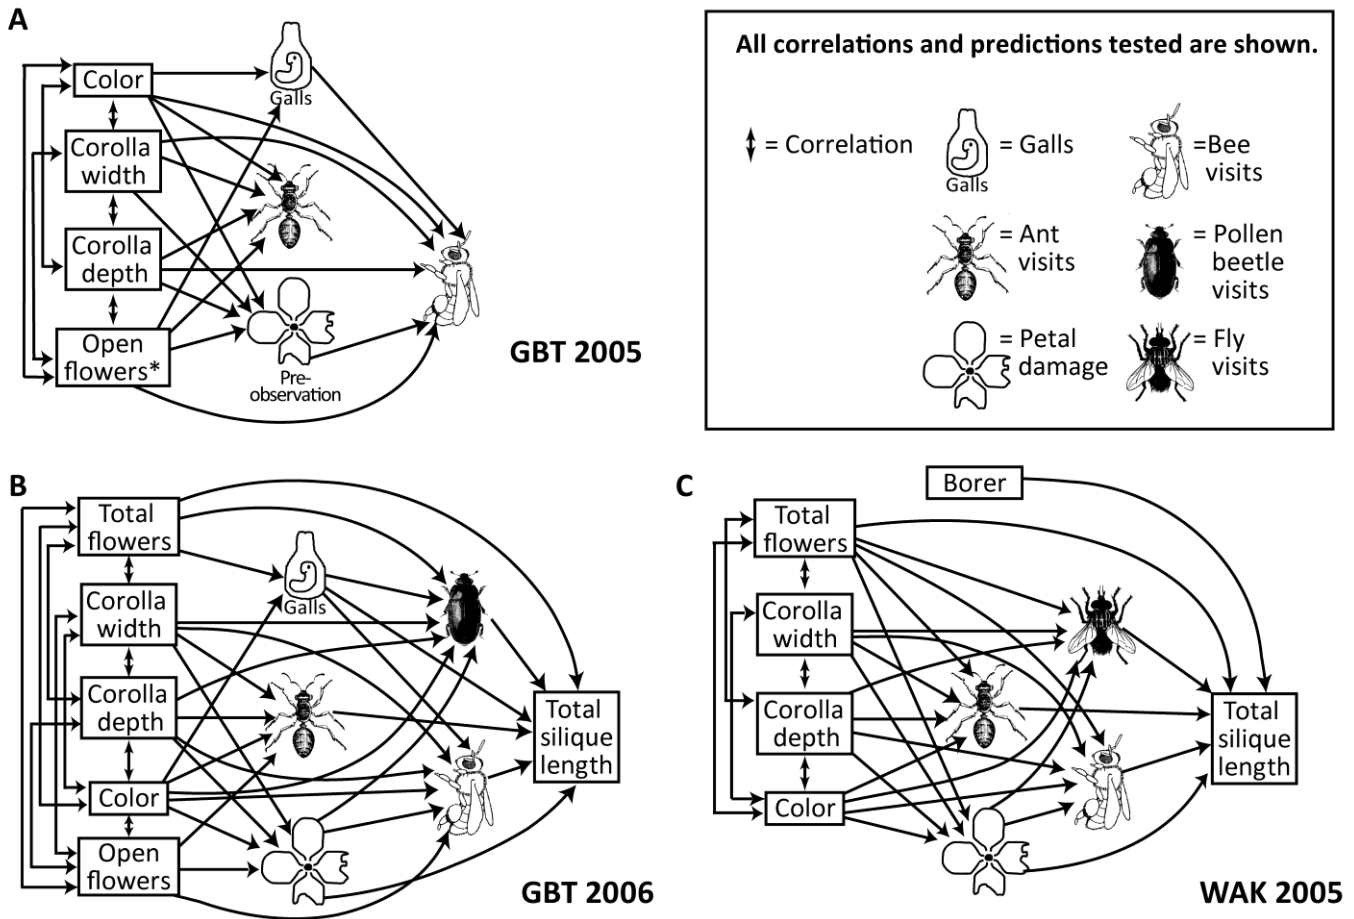

Supplement: supp_mcr152_mcr152supp_figs.pdf [file supp_mcr152_mcr152supp_figs.pdf]
